# Supplementary material for: A thorough anion–π interaction study in biomolecules: on the importance of cooperativity effects
Source: PubMed Central journal article supplement (PMC5967298; doi:10.1039/c5sc01386k), 2015-06-05
Supplement: SC-007-C5SC01386K-s002.pdf [file SC-007-C5SC01386K-s002.pdf]

# SUPPORTING INFORMATION

## FOR

### “A Thorough Anion– $\pi$ Interaction Study in Biomolecules: On the Importance of Cooperativity Effects”

*Xavier Lucas,\*<sup>1</sup> Antonio Bauzá,<sup>2</sup> Antonio Frontera,<sup>2</sup> and David Quiñonero,\*<sup>2</sup>*

<sup>1</sup> Pharmaceutical Bioinformatics, Institute of Pharmaceutical Sciences, Albert-Ludwigs-University, Hermann-Herder-Str. 9, D-79104 Freiburg, Germany.

<sup>2</sup> Departament de Química, Universitat de les Illes Balears, Crta. de Valldemossa km 7.5, 07122 Palma de Mallorca, Spain.

\* e-mail: david.quinonero@uib.es, Phone: +34 971173498, Fax: +34 971173426; e-mail: xavier.lucas@pharmazie.uni-freiburg.de

#### INDEX

-Supplementary Figures 1 and 2

-Supplementary Tables 1–24

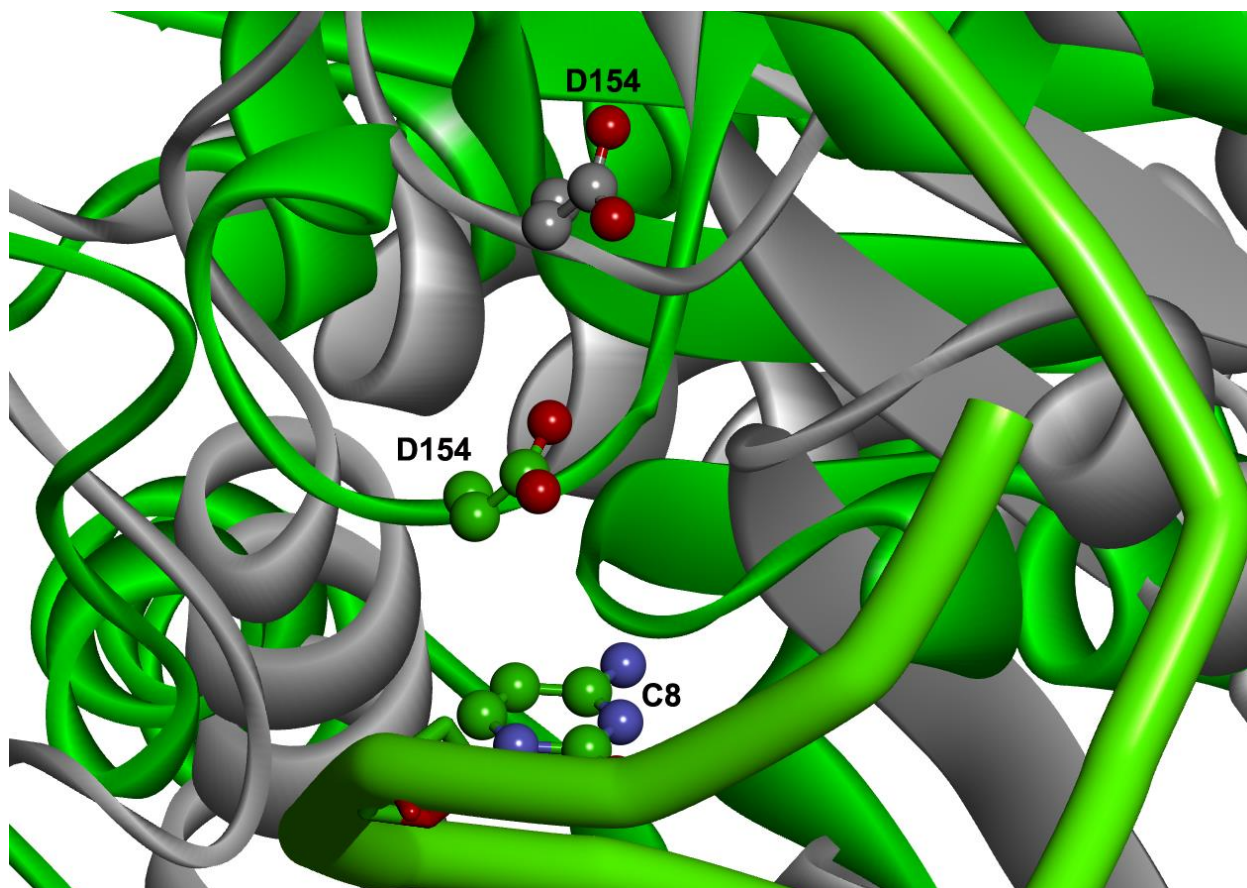

**Supplementary Figure 1.** Overlay of the *Bam*HI type II restriction endonuclease in its *apo* form (PDB code 1BAM, in grey) and in the pre-reactive state bound to DNA (PDB code 2BAM, in green), where the displacement of Asp154 is patent upon DNA binding.

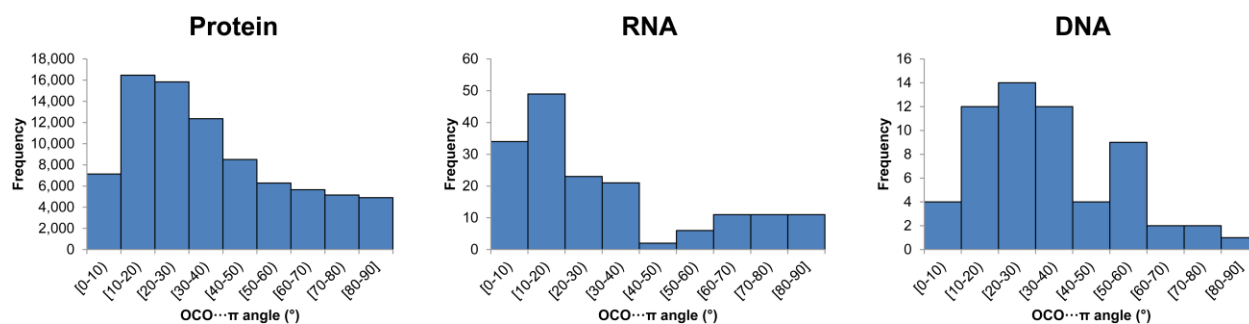

**Supplementary Figure 2.** Histograms of carboxylate- $\pi$  angle protein, RNA, and DNA binary anion- $\pi$  interactions for Asp and Glu.

**Supplementary Table 1. Definition of centers and centroids for the different amino acids, nucleic bases, and ions considered during data collection.** For polyatomic molecules, considered atom coordinates used to extract the corresponding centroid are highlighted.

| Aromatic systems |                                                                                           |                                                                                           |                                                                                            |                                                                                             |
|------------------|-------------------------------------------------------------------------------------------|-------------------------------------------------------------------------------------------|--------------------------------------------------------------------------------------------|---------------------------------------------------------------------------------------------|
| DNA              | DA<br>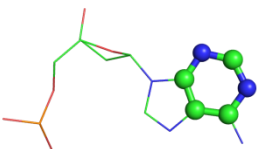   | DG<br>   | DC<br>   | DT<br>   |
| RNA              | A<br>    | G<br>    | C<br>    | U<br>    |
| Protein          | HIS<br> | PHE<br> | TRP<br> | TYR<br> |

| Anions                                                                                     |                                                                                            |                                                                                             |                      |
|--------------------------------------------------------------------------------------------|--------------------------------------------------------------------------------------------|---------------------------------------------------------------------------------------------|----------------------|
| ASP<br>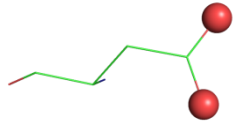 | GLU<br> | SO4<br> | F<br>CL<br>BR<br>IOD |
| CO3<br> | NO3<br> | PO4<br> |                      |

| Cations                                                                                    |                                                                                            |                     |
|--------------------------------------------------------------------------------------------|--------------------------------------------------------------------------------------------|---------------------|
| ARG<br>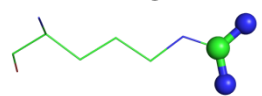 | LYS<br> | NA<br>K<br>CA<br>MG |

**Supplementary Table 2. Interacting residues from the search of anion– $\pi$  interactions in DNA, their amounts, and their respective percentages within the anion and deoxynucleotide (in italics) groups.**

| <b>Interacting residues</b> | <b>Amount</b> | <b>%</b> |
|-----------------------------|---------------|----------|
| DT                          | 33            | 47.8     |
| Glu                         | 32            | 46.4     |
| Asp                         | 31            | 44.9     |
| DC                          | 29            | 42.0     |
| DA                          | 6             | 8.7      |
| SO <sub>4</sub>             | 5             | 7.2      |
| Cl                          | 1             | 1.4      |
| DG                          | 1             | 1.4      |

**Supplementary Table 3. Binary anion– $\pi$  interactions in DNA.** Pairs of interacting residues and their occurrences in number (amount), percentage (%), and residues' representativities for each distinct anion (%A<sup>-</sup>) and  $\pi$ -system (% $\pi$ ). The expected amount of each interaction pair, according to its relative abundance, is shown. No statistically significant enrichments are found (Methods).

| <b>Interaction</b>  | <b>Amount (<i>expected</i>)</b> | <b>%</b> | <b>%A<sup>-</sup></b> | <b>%<math>\pi</math></b> |
|---------------------|---------------------------------|----------|-----------------------|--------------------------|
| Glu–DT              | 18 ( <i>15</i> )                | 26.1     | 56.2                  | 54.5                     |
| Asp–DC              | 16 ( <i>13</i> )                | 23.2     | 51.6                  | 55.2                     |
| Asp–DT              | 14 ( <i>15</i> )                | 20.3     | 45.2                  | 42.4                     |
| Glu–DC              | 9 ( <i>13</i> )                 | 13.0     | 28.1                  | 31.0                     |
| Glu–DA              | 5 ( <i>3</i> )                  | 7.2      | 15.6                  | 83.3                     |
| SO <sub>4</sub> –DC | 4 ( <i>2</i> )                  | 5.8      | 80.0                  | 13.8                     |
| SO <sub>4</sub> –DT | 1 ( <i>2</i> )                  | 1.4      | 20.0                  | 3.0                      |
| Asp–DA              | 1 ( <i>3</i> )                  | 1.4      | 3.2                   | 16.7                     |

|       |       |     |       |       |
|-------|-------|-----|-------|-------|
| Cl-DG | 1 (0) | 1.4 | 100.0 | 100.0 |
|-------|-------|-----|-------|-------|

**Supplementary Table 4. Binary anion- $\pi$  interactions in RNA.** Pairs of interacting residues and their occurrences in number (amount), percentage (%), and residues' representativities for each distinct anion (%A<sup>-</sup>) and  $\pi$ -system (% $\pi$ ). The expected amount of each interaction pair, according to its relative abundance, and the statistical significance are shown (Methods).

| <b>Interaction</b> | <b>Amount (<i>expected</i>)</b> | <b>%</b> | <b>%A<sup>-</sup></b> | <b>%<math>\pi</math></b> |
|--------------------|---------------------------------|----------|-----------------------|--------------------------|
| Glu-A              | 64 (43) *                       | 32.5     | 52.0                  | 92.8                     |
| Asp-C              | 40 (12) ***                     | 20.3     | 72.7                  | 90.9                     |
| Glu-G              | 30 (29)                         | 15.2     | 24.4                  | 65.2                     |
| Glu-U              | 27 (24)                         | 13.7     | 22.0                  | 71.1                     |
| Cl-G               | 13 (3) *                        | 6.6      | 100.0                 | 28.3                     |
| Asp-U              | 9 (11)                          | 4.6      | 16.4                  | 23.7                     |
| Asp-A              | 4 (19) **                       | 2.0      | 7.3                   | 5.8                      |
| Asp-G              | 2 (13) **                       | 1.0      | 3.6                   | 4.3                      |
| SO <sub>4</sub> -C | 2 (1)                           | 1.0      | 33.3                  | 4.5                      |
| Glu-C              | 2 (27) ***                      | 1.0      | 1.6                   | 4.5                      |
| SO <sub>4</sub> -U | 2 (1)                           | 1.0      | 33.3                  | 5.3                      |
| SO <sub>4</sub> -G | 1 (1)                           | 0.5      | 16.7                  | 2.2                      |
| SO <sub>4</sub> -A | 1 (2)                           | 0.5      | 16.7                  | 1.4                      |

**Supplementary Table 5. Interacting residues from the search of anion– $\pi$  interactions in RNA, their amounts, and their respective percentages within the anion and nucleotide (in italics) groups.**

| <b>Interacting residues</b> | <b>Amount</b> | <b>%</b> |
|-----------------------------|---------------|----------|
| Glu                         | 123           | 62.4     |
| A                           | 69            | 35.0     |
| Asp                         | 55            | 27.9     |
| G                           | 46            | 23.4     |
| C                           | 44            | 22.3     |
| U                           | 38            | 19.3     |
| Cl                          | 13            | 6.6      |
| SO <sub>4</sub>             | 6             | 3.0      |

**Supplementary Table 6. Interacting residues from the search of anion– $\pi$  interactions in proteins, their amounts, and their respective percentages within the anion and amino acid (in italics) groups.**

| <b>Interacting residues</b> | <b>Amount</b> | <b>%</b> |
|-----------------------------|---------------|----------|
| Glu                         | 46,132        | 55.9     |
| Asp                         | 34,214        | 41.5     |
| His                         | 24,677        | 29.9     |
| Phe                         | 24,035        | 29.1     |
| Tyr                         | 24,003        | 29.1     |
| Trp                         | 9,741         | 11.8     |
| SO <sub>4</sub>             | 1,055         | 1.3      |
| Cl                          | 627           | 0.8      |
| PO <sub>4</sub>             | 261           | 0.3      |
| NO <sub>3</sub>             | 94            | 0.1      |
| CO <sub>3</sub>             | 46            | 0.1      |

|    |    |     |
|----|----|-----|
| Br | 26 | 0.0 |
| F  | 1  | 0.0 |

**Supplementary Table 7. Binary anion– $\pi$  interactions in proteins.** Pairs of interacting residues and their occurrences in number (amount), percentage (%), and residues' representativities for each distinct anion ( $\%A^-$ ) and  $\pi$ -system ( $\%\pi$ ). The expected amount of each interaction pair, according to its relative abundance, and the statistical significance are shown (Methods).

| <b>Interaction</b>   | <b>Amount (expected)</b> | <b>%</b> | <b><math>\%A^-</math></b> | <b><math>\%\pi</math></b> |
|----------------------|--------------------------|----------|---------------------------|---------------------------|
| Glu–His              | 13,763 (13,805)          | 16.7     | 29.8                      | 55.8                      |
| Glu–Tyr              | 13,592 (13,428)          | 16.5     | 29.5                      | 56.6                      |
| Glu–Phe              | 13,060 (13,446) **       | 15.8     | 28.3                      | 54.3                      |
| Asp–Phe              | 10,477 (9,972) ***       | 12.7     | 30.6                      | 43.6                      |
| Asp–His              | 10,180 (10,239)          | 12.3     | 29.8                      | 41.3                      |
| Asp–Tyr              | 9,797 (9,959)            | 11.9     | 28.6                      | 40.6                      |
| Glu–Trp              | 5,717 (5,450) **         | 6.9      | 12.4                      | 58.7                      |
| Asp–Trp              | 3,760 (4,042) **         | 4.6      | 11.0                      | 38.6                      |
| SO <sub>4</sub> –His | 405 (316) **             | 0.5      | 38.4                      | 1.6                       |
| SO <sub>4</sub> –Tyr | 274 (307)                | 0.3      | 26.0                      | 1.1                       |
| SO <sub>4</sub> –Phe | 253 (308) *              | 0.3      | 24.0                      | 1.1                       |
| Cl–Tyr               | 193 (182)                | 0.2      | 30.8                      | 0.8                       |
| Cl–His               | 183 (188)                | 0.2      | 29.2                      | 0.7                       |
| Cl–Phe               | 163 (183)                | 0.2      | 26.0                      | 0.7                       |
| SO <sub>4</sub> –Trp | 123 (125)                | 0.1      | 11.7                      | 1.3                       |
| PO <sub>4</sub> –His | 110 (78) *               | 0.1      | 42.1                      | 0.4                       |
| Cl–Trp               | 88 (74)                  | 0.1      | 14.0                      | 0.9                       |
| PO <sub>4</sub> –Tyr | 70 (76)                  | 0.1      | 26.8                      | 0.3                       |
| NO <sub>3</sub> –Tyr | 51 (27) **               | 0.1      | 54.3                      | 0.2                       |
| PO <sub>4</sub> –Phe | 47 (76) *                | 0.1      | 18.0                      | 0.2                       |
| PO <sub>4</sub> –Trp | 34 (31)                  | 0.0      | 13.0                      | 0.3                       |

|                      |                  |     |       |     |
|----------------------|------------------|-----|-------|-----|
| CO <sub>3</sub> -Tyr | 23 ( <i>13</i> ) | 0.0 | 50.0  | 0.1 |
| NO <sub>3</sub> -Phe | 23 ( <i>27</i> ) | 0.0 | 24.5  | 0.1 |
| NO <sub>3</sub> -His | 15 ( <i>28</i> ) | 0.0 | 16.0  | 0.1 |
| Br-His               | 13 ( <i>8</i> )  | 0.0 | 50.0  | 0.1 |
| CO <sub>3</sub> -Trp | 9 ( <i>5</i> )   | 0.0 | 19.6  | 0.1 |
| CO <sub>3</sub> -His | 7 ( <i>14</i> )  | 0.0 | 15.2  | 0.0 |
| CO <sub>3</sub> -Phe | 7 ( <i>13</i> )  | 0.0 | 15.2  | 0.0 |
| Br-Phe               | 5 ( <i>8</i> )   | 0.0 | 19.2  | 0.0 |
| Br-Trp               | 5 ( <i>3</i> )   | 0.0 | 19.2  | 0.1 |
| NO <sub>3</sub> -Trp | 5 ( <i>11</i> )  | 0.0 | 5.3   | 0.1 |
| Br-Tyr               | 3 ( <i>8</i> )   | 0.0 | 11.5  | 0.0 |
| F-His                | 1 ( <i>0</i> )   | 0.0 | 100.0 | 0.0 |

**Supplementary Table 8. All interacting residues studied in our working set of 62,033 PDB structures, their amounts, and their respective percentages within the anion, cation (in bold), amino acid (in italics), nucleotide (underlined), and deoxynucleotide (underlined and in italics) groups.**

| <b>Interacting residues</b> | <b>Amount</b> | <b>%</b>           |
|-----------------------------|---------------|--------------------|
| Glu                         | 2,121,596     | 51.7               |
| Asp                         | 1,918,809     | 46.8               |
| Lys                         | 1,816,877     | <b>52.0</b>        |
| Arg                         | 1,631,104     | <b>46.7</b>        |
| Phe                         | 1,349,690     | 35.2               |
| Tyr                         | 1,186,004     | <i>31.0</i>        |
| His                         | 803,142       | <i>21.0</i>        |
| Trp                         | 491,434       | <i>12.8</i>        |
| SO <sub>4</sub>             | 34,818        | 0.8                |
| G                           | 21,904        | <u><i>31.4</i></u> |



|     |        |             |
|-----|--------|-------------|
| DG  | 18,996 | <u>28.6</u> |
| C   | 18,380 | <u>26.3</u> |
| DC  | 17,350 | <u>26.1</u> |
| Mg  | 17,051 | <b>0.5</b>  |
| A   | 16,591 | <u>23.8</u> |
| Cl  | 16,581 | 0.4         |
| Ca  | 16,126 | <b>0.5</b>  |
| DT  | 15,228 | <u>22.9</u> |
| DA  | 14,859 | <u>22.4</u> |
| U   | 12,975 | <u>18.6</u> |
| Na  | 9,846  | <b>0.3</b>  |
| PO4 | 6,040  | 0.1         |
| K   | 3,158  | <b>0.1</b>  |
| Br  | 1,397  | 0.0         |
| NO3 | 987    | 0.0         |
| CO3 | 342    | 0.0         |
| F   | 48     | 0.0         |

**Supplementary Table 9. Binary inter-chain anion- $\pi$  interactions in proteins.** Pairs of interacting residues and their occurrences in number (amount), percentage (%), and residues' representativities for each distinct anion ( $\%A^-$ ) and  $\pi$ -system ( $\%\pi$ ). The expected amount of each interaction pair, according to its relative abundance, is shown. No statistically significant enrichments are found (Methods).

| <b>Interaction</b> | <b>Amount (expected)</b> | <b>%</b> | <b><math>\%A^-</math></b> | <b><math>\%\pi</math></b> |
|--------------------|--------------------------|----------|---------------------------|---------------------------|
| Glu-Tyr            | 1,162 (1,137)            | 21.5     | 35.7                      | 61.6                      |
| Glu-Phe            | 991 (932)                | 18.4     | 30.5                      | 64.1                      |
| Glu-His            | 868 (928)                | 16.1     | 26.7                      | 56.4                      |
| Asp-Tyr            | 725 (750)                | 13.4     | 33.8                      | 38.4                      |

|         |                    |      |      |      |
|---------|--------------------|------|------|------|
| Asp–His | 672 ( <i>612</i> ) | 12.5 | 31.4 | 43.6 |
| Asp–Phe | 555 ( <i>614</i> ) | 10.3 | 25.9 | 35.9 |
| Glu–Trp | 231 ( <i>254</i> ) | 4.3  | 7.1  | 54.7 |
| Asp–Trp | 191 ( <i>168</i> ) | 3.5  | 8.9  | 45.3 |

**Supplementary Table 10. Interacting residues from the search of anion– $\pi$  surface interactions in proteins, their amounts, and their respective percentages within the anion and amino acid (in italics) groups.**

| Interacting residues | Amount | %    |
|----------------------|--------|------|
| Glu                  | 3,252  | 60.3 |
| Asp                  | 2,143  | 39.7 |
| Tyr                  | 1,887  | 35.0 |
| Phe                  | 1,546  | 28.7 |
| His                  | 1,540  | 28.5 |
| Trp                  | 422    | 7.8  |

**Supplementary Table 11. Ternary anion– $\pi$ – $\pi$  interactions in DNA.** Triads of interacting residues and their occurrences in number (amount), percentage (%), and residues' representativities for each distinct anion ( $\%A^-$ ), central  $\pi$ -system ( $\%\pi_c$ ), and terminal  $\pi$ -system ( $\%\pi_t$ ). The expected amount of each interaction pair, according to its relative abundance, and the statistical significance are shown (Methods).

| Interaction | Amount ( <i>expected</i> ) | %    | $\%A^-$ | $\%\pi_c$ | $\%\pi_t$ |
|-------------|----------------------------|------|---------|-----------|-----------|
| Asp–His–DT  | 18 (5) **                  | 30.5 | 48.6    | 100.0     | 40.0      |
| Glu–DT–DA   | 7 (2)                      | 11.9 | 36.8    | 15.6      | 35.0      |
| Asp–DC–DA   | 6 (4)                      | 10.2 | 16.2    | 31.6      | 30.0      |
| Asp–DC–DT   | 5 (5)                      | 8.5  | 13.5    | 26.3      | 11.1      |
| Glu–DC–DG   | 4 (1)                      | 6.8  | 21.1    | 21.1      | 33.3      |

|                        |       |     |      |       |       |
|------------------------|-------|-----|------|-------|-------|
| Asp–DT–DG              | 4 (2) | 6.8 | 10.8 | 8.9   | 33.3  |
| Glu–DT–DG              | 3 (1) | 5.1 | 15.8 | 6.7   | 25.0  |
| Asp–DT–DA              | 2 (4) | 3.4 | 5.4  | 4.4   | 10.0  |
| Glu–Trp–DT             | 2 (0) | 3.4 | 10.5 | 100.0 | 4.4   |
| Asp–Tyr–DT             | 1 (0) | 1.7 | 2.7  | 100.0 | 2.2   |
| Glu–DC–DA              | 1 (2) | 1.7 | 5.3  | 5.3   | 5.0   |
| SO <sub>4</sub> –DT–DA | 1 (0) | 1.7 | 33.3 | 2.2   | 5.0   |
| SO <sub>4</sub> –DC–DA | 1 (0) | 1.7 | 33.3 | 5.3   | 5.0   |
| Glu–DA–DA              | 1 (0) | 1.7 | 5.3  | 5.0   | 5.0   |
| SO <sub>4</sub> –DC–DG | 1 (0) | 1.7 | 33.3 | 5.3   | 8.3   |
| Asp–DT–DC              | 1 (0) | 1.7 | 2.7  | 2.2   | 5.3   |
| Glu–DT–Phe             | 1 (0) | 1.7 | 5.3  | 2.2   | 100.0 |

**Supplementary Table 12. Interacting residues from the search of anion– $\pi$ – $\pi$  interactions in DNA, their amounts (central+terminal), and their respective percentages for the anions, central, and terminal aromatic moieties.**

| Interacting residues | Amount     | %A <sup>-</sup> | % $\pi_c$ | % $\pi_t$ |
|----------------------|------------|-----------------|-----------|-----------|
| DT                   | 45 (19+26) | -               | 32.2      | 44.1      |
| Asp                  | 37         | 47.4            | -         | -         |
| DA                   | 20 (1+19)  | -               | 1.7       | 32.2      |
| DC                   | 19 (18+1)  | -               | 30.5      | 1.7       |
| Glu                  | 19         | 44.7            | -         | -         |
| His                  | 18 (18+0)  | -               | 30.5      | 0.0       |
| DG                   | 12 (0+12)  | -               | 0.0       | 20.3      |
| SO <sub>4</sub>      | 3          | 7.9             | -         | -         |
| Trp                  | 2 (2+0)    | -               | 3.4       | 0.0       |
| Phe                  | 1 (0+1)    | -               | 0.0       | 1.7       |

|     |         |   |     |     |
|-----|---------|---|-----|-----|
| Tyr | 1 (1+0) | - | 1.7 | 0.0 |
|-----|---------|---|-----|-----|

---

**Supplementary Table 13. Ternary anion– $\pi$ –cation interactions in RNA.** Triads of interacting residues and their occurrences in number (amount), percentage (%), and residues' representativities for each distinct anion (%A<sup>-</sup>), central  $\pi$ -system (% $\pi_c$ ), and cation (%C<sup>+</sup>). The expected amount of each interaction pair, according to its relative abundance, and the statistical significance are shown (Methods).

| <b>Interaction</b>     | <b>Amount (<i>expected</i>)</b> | <b>%</b> | <b>%A<sup>-</sup></b> | <b>%<math>\pi_c</math></b> | <b>%C<sup>+</sup></b> |
|------------------------|---------------------------------|----------|-----------------------|----------------------------|-----------------------|
| Glu–A–Arg              | 13 ( <i>11</i> )                | 86.7     | 100.0                 | 92.9                       | 92.9                  |
| SO <sub>4</sub> –G–Arg | 1 ( <i>0</i> )                  | 6.7      | 100.0                 | 100.0                      | 7.1                   |
| Asp–A–Lys              | 1 ( <i>0</i> )                  | 6.7      | 100.0                 | 7.1                        | 100.0                 |

**Supplementary Table 14. Interacting residues from the search of anion– $\pi$ –cation interactions in RNA, their amounts, and their respective percentages within the anion, nucleotide (in italics), and cation (in bold) groups.**

| <b>Interacting residues</b> | <b>Amount</b> | <b>%</b>    |
|-----------------------------|---------------|-------------|
| A                           | 14            | <i>93.3</i> |
| Arg                         | 14            | <b>93.3</b> |
| Glu                         | 13            | 86.7        |
| Asp                         | 1             | 6.7         |
| G                           | 1             | 6.7         |
| Lys                         | 1             | <b>6.7</b>  |
| SO <sub>4</sub>             | 1             | 6.7         |

**Supplementary Table 15. Ternary anion- $\pi$ - $\pi$  interactions in RNA.** Triads of interacting residues and their occurrences in number (amount), percentage (%), and residues' representativities for each distinct anion (%A<sup>-</sup>), central  $\pi$ -system (% $\pi_c$ ), and terminal  $\pi$ -system (% $\pi_t$ ). The expected amount of each interaction pair, according to its relative abundance, is shown. No statistically significant enrichments are found (Methods).

| <b>Interaction</b>   | <b>Amount (<i>expected</i>)</b> | <b>%</b> | <b>%A<sup>-</sup></b> | <b>%<math>\pi_c</math></b> | <b>%<math>\pi_t</math></b> |
|----------------------|---------------------------------|----------|-----------------------|----------------------------|----------------------------|
| Asp-C-A              | 12 (5)                          | 46.2     | 70.6                  | 85.7                       | 92.3                       |
| Glu-His-U            | 5 (0)                           | 19.2     | 71.4                  | 100.0                      | 83.3                       |
| Asp-U-Phe            | 3 (0)                           | 11.5     | 17.6                  | 75.0                       | 100.0                      |
| Asp-G-A              | 1 (1)                           | 3.8      | 5.9                   | 50.0                       | 7.7                        |
| Asp-C-C              | 1 (1)                           | 3.8      | 5.9                   | 7.1                        | 50.0                       |
| Glu-G-Tyr            | 1 (0)                           | 3.8      | 14.3                  | 50.0                       | 50.0                       |
| Glu-A-Tyr            | 1 (0)                           | 3.8      | 14.3                  | 100.0                      | 50.0                       |
| SO <sub>4</sub> -C-C | 1 (0)                           | 3.8      | 50.0                  | 7.1                        | 50.0                       |
| SO <sub>4</sub> -U-U | 1 (0)                           | 3.8      | 50.0                  | 25.0                       | 16.7                       |

**Supplementary Table 16. Interacting residues from the search of anion- $\pi$ - $\pi$  interactions in RNA, their amounts (central+terminal), and their respective percentages for the anions, central, and terminal aromatic moieties.**

| <b>Interacting residues</b> | <b>Amount</b> | <b>%A<sup>-</sup></b> | <b>%<math>\pi_c</math></b> | <b>%<math>\pi_t</math></b> |
|-----------------------------|---------------|-----------------------|----------------------------|----------------------------|
| Asp                         | 17            | 65.4                  | -                          | -                          |
| C                           | 16 (14+2)     | -                     | 53.8                       | 7.7                        |
| A                           | 14 (1+13)     | -                     | 3.8                        | 50.0                       |
| U                           | 10 (4+6)      | -                     | 15.4                       | 23.1                       |
| Glu                         | 7             | 26.9                  | -                          | -                          |
| His                         | 5 (5+0)       | -                     | 19.2                       | 0.0                        |
| Phe                         | 3 (0+3)       | -                     | 0.0                        | 11.5                       |

|                 |         |     |     |     |
|-----------------|---------|-----|-----|-----|
| G               | 2 (2+0) | -   | 7.7 | 0.0 |
| SO <sub>4</sub> | 2       | 7.7 | -   | -   |
| Tyr             | 2 (0+2) | -   | 0.0 | 7.7 |

**Supplementary Table 17. Interacting residues from the search of anion- $\pi$ -cation interactions in proteins, their amounts, and their respective percentages within the anion, amino acid (in italics), and cation (in bold) groups.**

| Interacting residues | Amount | %           |
|----------------------|--------|-------------|
| Arg                  | 1,652  | <b>68.9</b> |
| Glu                  | 1,183  | 49.3        |
| Asp                  | 1,147  | 47.8        |
| Tyr                  | 729    | <i>30.4</i> |
| Lys                  | 707    | <b>29.5</b> |
| His                  | 639    | 26.6        |
| Phe                  | 611    | 25.5        |
| Trp                  | 419    | <i>17.5</i> |
| SO <sub>4</sub>      | 44     | 1.8         |
| Na                   | 35     | <b>1.5</b>  |
| Cl                   | 18     | 0.8         |
| PO <sub>4</sub>      | 5      | 0.2         |
| K                    | 4      | <b>0.2</b>  |
| NO <sub>3</sub>      | 1      | 0.0         |

**Supplementary Table 18. Ternary anion- $\pi$ -cation interactions in proteins.** Triads of interacting residues and their occurrences in number (amount), percentage (%), and residues' representativities for each distinct anion (%A<sup>-</sup>), central  $\pi$ -system (% $\pi_c$ ), and cation (%C<sup>+</sup>). The expected amount of each interaction pair, according to its relative abundance, and the statistical significance are shown (Methods).

| <b>Interaction</b>       | <b>Amount (<i>expected</i>)</b> | <b>%</b> | <b>%A<sup>-</sup></b> | <b>%π<sub>c</sub></b> | <b>%C<sup>+</sup></b> |
|--------------------------|---------------------------------|----------|-----------------------|-----------------------|-----------------------|
| Asp–His–Arg              | 272 (211) **                    | 11.4     | 23.7                  | 42.6                  | 16.5                  |
| Asp–Tyr–Arg              | 268 (240)                       | 11.2     | 23.4                  | 36.8                  | 16.2                  |
| Glu–Tyr–Arg              | 250 (248)                       | 10.4     | 21.1                  | 34.3                  | 15.1                  |
| Glu–Phe–Arg              | 244 (208)                       | 10.2     | 20.6                  | 39.9                  | 14.8                  |
| Glu–His–Arg              | 189 (217)                       | 7.9      | 16.0                  | 29.6                  | 11.4                  |
| Glu–Trp–Arg              | 175 (142)                       | 7.3      | 14.8                  | 41.8                  | 10.6                  |
| Asp–Phe–Arg              | 130 (201) ***                   | 5.4      | 11.3                  | 21.3                  | 7.9                   |
| Asp–Phe–Lys              | 129 (86) **                     | 5.4      | 11.2                  | 21.1                  | 18.2                  |
| Glu–Trp–Lys              | 115 (61) ***                    | 4.8      | 9.7                   | 27.4                  | 16.3                  |
| Asp–Tyr–Lys              | 106 (103)                       | 4.4      | 9.2                   | 14.5                  | 15.0                  |
| Asp–His–Lys              | 82 (90)                         | 3.4      | 7.1                   | 12.8                  | 11.6                  |
| Asp–Trp–Arg              | 81 (138) ***                    | 3.4      | 7.1                   | 19.3                  | 4.9                   |
| Glu–Tyr–Lys              | 76 (106) *                      | 3.2      | 6.4                   | 10.4                  | 10.7                  |
| Glu–His–Lys              | 67 (93) *                       | 2.8      | 5.7                   | 10.5                  | 9.5                   |
| Glu–Phe–Lys              | 63 (89) *                       | 2.6      | 5.3                   | 10.3                  | 8.9                   |
| Asp–Trp–Lys              | 44 (59)                         | 1.8      | 3.8                   | 10.5                  | 6.2                   |
| Asp–Phe–Na               | 35 (4) ***                      | 1.5      | 3.1                   | 5.7                   | 100.0                 |
| SO <sub>4</sub> –Tyr–Arg | 15 (9)                          | 0.6      | 34.1                  | 2.1                   | 0.9                   |
| SO <sub>4</sub> –Tyr–Lys | 9 (4)                           | 0.4      | 20.5                  | 1.2                   | 1.3                   |
| SO <sub>4</sub> –His–Arg | 8 (8)                           | 0.3      | 18.2                  | 1.3                   | 0.5                   |
| Cl–His–Lys               | 8 (1) *                         | 0.3      | 44.4                  | 1.3                   | 1.1                   |
| SO <sub>4</sub> –Phe–Lys | 6 (3)                           | 0.3      | 13.6                  | 1.0                   | 0.8                   |
| PO <sub>4</sub> –His–Arg | 4 (1)                           | 0.2      | 80.0                  | 0.6                   | 0.2                   |
| Glu–His–K                | 4 (1)                           | 0.2      | 0.3                   | 0.6                   | 100.0                 |
| Cl–Tyr–Arg               | 4 (4)                           | 0.2      | 22.2                  | 0.5                   | 0.2                   |
| Cl–His–Arg               | 4 (3)                           | 0.2      | 22.2                  | 0.6                   | 0.2                   |
| SO <sub>4</sub> –Phe–Arg | 3 (8)                           | 0.1      | 6.8                   | 0.5                   | 0.2                   |
| Cl–Trp–Arg               | 1 (2)                           | 0.0      | 5.6                   | 0.2                   | 0.1                   |
| Cl–Phe–Arg               | 1 (3)                           | 0.0      | 5.6                   | 0.2                   | 0.1                   |
| SO <sub>4</sub> –Trp–Lys | 1 (2)                           | 0.0      | 2.3                   | 0.2                   | 0.1                   |

|                          |                |     |       |     |     |
|--------------------------|----------------|-----|-------|-----|-----|
| SO <sub>4</sub> –His–Lys | 1 (3)          | 0.0 | 2.3   | 0.2 | 0.1 |
| NO <sub>3</sub> –Trp–Arg | 1 (0)          | 0.0 | 100.0 | 0.2 | 0.1 |
| PO <sub>4</sub> –Tyr–Arg | 1 ( <i>I</i> ) | 0.0 | 20.0  | 0.1 | 0.1 |
| SO <sub>4</sub> –Trp–Arg | 1 (5)          | 0.0 | 2.3   | 0.2 | 0.1 |

**Supplementary Table 19. Interacting residues from the search of anion– $\pi$ –cation surface interactions in proteins, their amounts, and their respective percentages within the anion, amino acid (in italics), and cation (in bold) groups.**

| Interacting residues | Amount | %           |
|----------------------|--------|-------------|
| Arg                  | 188    | <b>71.2</b> |
| Glu                  | 150    | 56.8        |
| Asp                  | 114    | 43.2        |
| Phe                  | 114    | 43.2        |
| Lys                  | 76     | <b>28.8</b> |
| Tyr                  | 59     | 22.3        |
| Trp                  | 48     | 18.2        |
| His                  | 43     | 16.3        |

**Supplementary Table 20. Ternary anion– $\pi$ –cation surface interactions in proteins.** Triads of interacting residues and their occurrences in number (amount), percentage (%), and residues' representativities for each distinct anion (%A<sup>-</sup>), central  $\pi$ -system (% $\pi_c$ ), and cation (%C<sup>+</sup>). The expected amount of each interaction pair, according to its relative abundance, and the statistical significance are shown (Methods).

| Interaction | Amount ( <i>expected</i> ) | %    | %A <sup>-</sup> | % $\pi_c$ | %C <sup>+</sup> |
|-------------|----------------------------|------|-----------------|-----------|-----------------|
| Glu–Phe–Arg | 47 ( <i>46</i> )           | 17.8 | 31.3            | 41.2      | 25.0            |
| Asp–Phe–Arg | 43 ( <i>35</i> )           | 16.3 | 37.7            | 37.7      | 22.9            |



|             |          |     |      |      |      |
|-------------|----------|-----|------|------|------|
| Asp–Tyr–Arg | 21 (18)  | 8.0 | 18.4 | 35.6 | 11.2 |
| Glu–His–Arg | 21 (17)  | 8.0 | 14.0 | 48.8 | 11.2 |
| Glu–Trp–Lys | 20 (8) * | 7.6 | 13.3 | 41.7 | 26.3 |
| Glu–Trp–Arg | 20 (19)  | 7.6 | 13.3 | 41.7 | 10.6 |
| Glu–Tyr–Arg | 19 (24)  | 7.2 | 12.7 | 32.2 | 10.1 |
| Asp–Phe–Lys | 14 (14)  | 5.3 | 12.3 | 12.3 | 18.4 |
| Asp–His–Arg | 10 (13)  | 3.8 | 8.8  | 23.3 | 5.3  |
| Glu–Phe–Lys | 10 (19)  | 3.8 | 6.7  | 8.8  | 13.2 |
| Asp–Tyr–Lys | 10 (7)   | 3.8 | 8.8  | 16.9 | 13.2 |
| Glu–Tyr–Lys | 9 (10)   | 3.4 | 6.0  | 15.3 | 11.8 |
| Asp–His–Lys | 8 (5)    | 3.0 | 7.0  | 18.6 | 10.5 |
| Asp–Trp–Arg | 7 (15)   | 2.7 | 6.1  | 14.6 | 3.7  |
| Glu–His–Lys | 4 (7)    | 1.5 | 2.7  | 9.3  | 5.3  |
| Asp–Trp–Lys | 1 (6)    | 0.4 | 0.9  | 2.1  | 1.3  |

**Supplementary Table 21. Interacting residues from the search of anion– $\pi$ – $\pi$  interactions in proteins, their amounts (central+terminal), and their respective percentages for the anions, central, and terminal aromatic moieties.**

| Interacting residues | Amount            | %A <sup>-</sup> | % $\pi_c$ | % $\pi_t$ |
|----------------------|-------------------|-----------------|-----------|-----------|
| Phe                  | 2,089 (775+1,314) | -               | 26.3      | 44.6      |
| Glu                  | 1,658             | 56.3            | -         | -         |
| Tyr                  | 1,637 (944+693)   | -               | 32.1      | 23.5      |
| Asp                  | 1,216             | 41.3            | -         | -         |
| His                  | 1,198 (701+497)   | -               | 23.8      | 16.9      |
| Trp                  | 966 (525+441)     | -               | 17.8      | 15.0      |
| SO <sub>4</sub>      | 30                | 1.0             | -         | -         |
| Cl                   | 23                | 0.8             | -         | -         |

|                 |    |     |   |   |
|-----------------|----|-----|---|---|
| PO <sub>4</sub> | 10 | 0.3 | - | - |
| NO <sub>3</sub> | 7  | 0.2 | - | - |
| CO <sub>3</sub> | 1  | 0.0 | - | - |

**Supplementary Table 22. Ternary anion- $\pi$ - $\pi$  interactions in proteins.** Triads of interacting residues and their occurrences in number (amount), percentage (%), and residues' representativities for each distinct anion (%A<sup>-</sup>), central (% $\pi_c$ ), and terminal (% $\pi_t$ )  $\pi$ -systems. The expected amount of each interaction pair, according to its relative abundance, and the statistical significance are shown (Methods).

| <b>Interaction</b> | <b>Amount (expected)</b> | <b>%</b> | <b>%A<sup>-</sup></b> | <b>%<math>\pi_c</math></b> | <b>%<math>\pi_t</math></b> |
|--------------------|--------------------------|----------|-----------------------|----------------------------|----------------------------|
| Glu-Tyr-Phe        | 409 (237) ***            | 13.9     | 24.7                  | 43.3                       | 31.1                       |
| Glu-Phe-Tyr        | 194 (103) ***            | 6.6      | 11.7                  | 25.0                       | 28.0                       |
| Glu-Phe-Phe        | 170 (195)                | 5.8      | 10.3                  | 21.9                       | 12.9                       |
| Asp-Phe-Phe        | 148 (143)                | 5.0      | 12.2                  | 19.1                       | 11.3                       |
| Asp-Tyr-Phe        | 146 (174)                | 5.0      | 12.0                  | 15.5                       | 11.1                       |
| Asp-His-His        | 117 (49) ***             | 4.0      | 9.6                   | 16.7                       | 23.5                       |
| Glu-Tyr-Tyr        | 112 (125)                | 3.8      | 6.8                   | 11.9                       | 16.2                       |
| Asp-His-Phe        | 111 (128)                | 3.8      | 9.1                   | 15.8                       | 8.4                        |
| Asp-Trp-Phe        | 110 (97)                 | 3.7      | 9.0                   | 21.0                       | 8.4                        |
| Glu-His-Phe        | 104 (175) ***            | 3.5      | 6.3                   | 14.8                       | 7.9                        |
| Glu-Trp-His        | 92 (50) ***              | 3.1      | 5.5                   | 17.5                       | 18.5                       |
| Glu-Trp-Trp        | 83 (50) **               | 2.8      | 5.0                   | 15.8                       | 18.8                       |
| Asp-Phe-Tyr        | 80 (76)                  | 2.7      | 6.6                   | 10.3                       | 11.5                       |
| Asp-His-Trp        | 77 (48) *                | 2.6      | 6.3                   | 11.0                       | 17.5                       |
| Glu-Trp-Phe        | 76 (132) ***             | 2.6      | 4.6                   | 14.5                       | 5.8                        |
| Glu-His-Tyr        | 76 (92)                  | 2.6      | 4.6                   | 10.8                       | 11.0                       |
| Asp-Tyr-Trp        | 73 (66)                  | 2.5      | 6.0                   | 7.7                        | 16.6                       |
| Asp-His-Tyr        | 69 (68)                  | 2.3      | 5.7                   | 9.8                        | 10.0                       |

|                          |             |     |      |     |      |
|--------------------------|-------------|-----|------|-----|------|
| Asp-Tyr-Tyr              | 67 (92)     | 2.3 | 5.5  | 7.1 | 9.7  |
| Glu-His-Trp              | 63 (66)     | 2.1 | 3.8  | 9.0 | 14.3 |
| Glu-His-His              | 62 (67)     | 2.1 | 3.7  | 8.8 | 12.5 |
| Glu-Phe-His              | 59 (74)     | 2.0 | 3.6  | 7.6 | 11.9 |
| Glu-Trp-Tyr              | 49 (70)     | 1.7 | 3.0  | 9.3 | 7.1  |
| Asp-Phe-His              | 43 (54)     | 1.5 | 3.5  | 5.5 | 8.7  |
| Glu-Tyr-His              | 42 (90) *** | 1.4 | 2.5  | 4.4 | 8.5  |
| Asp-Trp-His              | 38 (37)     | 1.3 | 3.1  | 7.2 | 7.6  |
| Asp-Tyr-His              | 37 (66) **  | 1.3 | 3.0  | 3.9 | 7.4  |
| Asp-Trp-Trp              | 36 (37)     | 1.2 | 3.0  | 6.9 | 8.2  |
| Glu-Tyr-Trp              | 34 (89) *** | 1.2 | 2.1  | 3.6 | 7.7  |
| Asp-Phe-Trp              | 34 (54) *   | 1.2 | 2.8  | 4.4 | 7.7  |
| Glu-Phe-Trp              | 33 (74) *** | 1.1 | 2.0  | 4.3 | 7.5  |
| Asp-Trp-Tyr              | 30 (51) *   | 1.0 | 2.5  | 5.7 | 4.3  |
| SO <sub>4</sub> -His-Phe | 8 (3)       | 0.3 | 26.7 | 1.1 | 0.6  |
| Cl-Tyr-Phe               | 8 (3)       | 0.3 | 34.8 | 0.8 | 0.6  |
| PO <sub>4</sub> -His-Phe | 6 (2)       | 0.2 | 60.0 | 0.9 | 0.5  |
| SO <sub>4</sub> -Tyr-Phe | 6 (4)       | 0.2 | 20.0 | 0.6 | 0.5  |
| Cl-Phe-Phe               | 3 (3)       | 0.1 | 13.0 | 0.4 | 0.2  |
| NO <sub>3</sub> -Tyr-Phe | 3 (1)       | 0.1 | 42.9 | 0.3 | 0.2  |
| Cl-Phe-His               | 3 (1)       | 0.1 | 13.0 | 0.4 | 0.6  |
| SO <sub>4</sub> -His-Tyr | 3 (2)       | 0.1 | 10.0 | 0.4 | 0.4  |
| SO <sub>4</sub> -Tyr-Tyr | 3 (2)       | 0.1 | 10.0 | 0.3 | 0.4  |
| SO <sub>4</sub> -Trp-Trp | 3 (1)       | 0.1 | 10.0 | 0.6 | 0.7  |
| Cl-Trp-Tyr               | 3 (1)       | 0.1 | 13.0 | 0.6 | 0.4  |
| SO <sub>4</sub> -Phe-His | 2 (1)       | 0.1 | 6.7  | 0.3 | 0.4  |
| SO <sub>4</sub> -Phe-Phe | 2 (4)       | 0.1 | 6.7  | 0.3 | 0.2  |
| NO <sub>3</sub> -Tyr-Tyr | 2 (1)       | 0.1 | 28.6 | 0.2 | 0.3  |
| SO <sub>4</sub> -His-Trp | 1 (1)       | 0.0 | 3.3  | 0.1 | 0.2  |
| PO <sub>4</sub> -Trp-Phe | 1 (1)       | 0.0 | 10.0 | 0.2 | 0.1  |
| PO <sub>4</sub> -His-His | 1 (1)       | 0.0 | 10.0 | 0.1 | 0.2  |

|                          |       |     |       |     |     |
|--------------------------|-------|-----|-------|-----|-----|
| NO <sub>3</sub> -Phe-Trp | 1 (0) | 0.0 | 14.3  | 0.1 | 0.2 |
| Cl-Tyr-Tyr               | 1 (2) | 0.0 | 4.3   | 0.1 | 0.1 |
| Cl-His-His               | 1 (1) | 0.0 | 4.3   | 0.1 | 0.2 |
| Cl-His-Phe               | 1 (2) | 0.0 | 4.3   | 0.1 | 0.1 |
| CO <sub>3</sub> -His-Trp | 1 (0) | 0.0 | 100.0 | 0.1 | 0.2 |
| SO <sub>4</sub> -Trp-Phe | 1 (2) | 0.0 | 3.3   | 0.2 | 0.1 |
| Cl-Trp-Phe               | 1 (2) | 0.0 | 4.3   | 0.2 | 0.1 |
| SO <sub>4</sub> -Phe-Trp | 1 (1) | 0.0 | 3.3   | 0.1 | 0.2 |
| Cl-Phe-Tyr               | 1 (1) | 0.0 | 4.3   | 0.1 | 0.1 |
| Cl-Phe-Trp               | 1 (1) | 0.0 | 4.3   | 0.1 | 0.2 |
| PO <sub>4</sub> -Trp-Tyr | 1 (1) | 0.0 | 10.0  | 0.2 | 0.1 |
| NO <sub>3</sub> -Trp-Tyr | 1 (0) | 0.0 | 14.3  | 0.2 | 0.1 |
| PO <sub>4</sub> -Tyr-Tyr | 1 (1) | 0.0 | 10.0  | 0.1 | 0.1 |

**Supplementary Table 23. Interacting residues from the search of anion- $\pi$ - $\pi$  surface interactions in proteins, their amounts (central+terminal), and their respective percentages for the anions, central, and terminal aromatic moieties.**

| Interacting residues | Amount       | %A <sup>-</sup> | % $\pi_c$ | % $\pi_t$ |
|----------------------|--------------|-----------------|-----------|-----------|
| Phe                  | 287 (97+190) | -               | 27.4      | 53.7      |
| Glu                  | 205          | 57.9            | -         | -         |
| Tyr                  | 180 (109+71) | -               | 30.8      | 20.0      |
| Asp                  | 149          | 42.1            | -         | -         |
| His                  | 142 (83+59)  | -               | 23.4      | 16.7      |
| Trp                  | 99 (65+34)   | -               | 18.4      | 9.6       |

**Supplementary Table 24. Ternary inter-chain anion- $\pi$ - $\pi$  interactions in proteins.** Triads of interacting residues and their occurrences in number (amount), percentage (%), and residues' representativities for each distinct anion ( $\%A^-$ ), central ( $\%\pi_c$ ), and terminal ( $\%\pi_t$ )  $\pi$ -systems. The expected amount of each interaction pair, according to its relative abundance, and the statistical significance are shown (Methods).

| <b>Interaction</b> | <b>Amount (<i>expected</i>)</b> | <b>%</b> | <b><math>\%A^-</math></b> | <b><math>\%\pi_c</math></b> | <b><math>\%\pi_t</math></b> |
|--------------------|---------------------------------|----------|---------------------------|-----------------------------|-----------------------------|
| Glu-Tyr-Phe        | 46 (34)                         | 13.0     | 22.4                      | 42.2                        | 24.2                        |
| Asp-Trp-Phe        | 41 (15) ***                     | 11.6     | 27.5                      | 63.1                        | 21.6                        |
| Glu-Phe-Phe        | 38 (30)                         | 10.7     | 18.5                      | 39.2                        | 20.0                        |
| Glu-His-His        | 23 (8) **                       | 6.5      | 11.2                      | 27.7                        | 39.0                        |
| Asp-Phe-Phe        | 22 (22)                         | 6.2      | 14.8                      | 22.7                        | 11.6                        |
| Asp-Tyr-Phe        | 21 (25)                         | 5.9      | 14.1                      | 19.3                        | 11.1                        |
| Glu-Phe-Tyr        | 20 (11)                         | 5.6      | 9.8                       | 20.6                        | 28.2                        |
| Glu-Tyr-Tyr        | 14 (13)                         | 4.0      | 6.8                       | 12.8                        | 19.7                        |
| Glu-His-Tyr        | 12 (10)                         | 3.4      | 5.9                       | 14.5                        | 16.9                        |
| Asp-His-Trp        | 10 (3)                          | 2.8      | 6.7                       | 12.0                        | 29.4                        |
| Asp-Tyr-Tyr        | 9 (9)                           | 2.5      | 6.0                       | 8.3                         | 12.7                        |
| Glu-Tyr-His        | 9 (11)                          | 2.5      | 4.4                       | 8.3                         | 15.3                        |
| Asp-His-His        | 9 (6)                           | 2.5      | 6.0                       | 10.8                        | 15.3                        |
| Glu-His-Phe        | 8 (26) **                       | 2.3      | 3.9                       | 9.6                         | 4.2                         |
| Asp-His-Phe        | 8 (19) *                        | 2.3      | 5.4                       | 9.6                         | 4.2                         |
| Glu-Trp-Trp        | 8 (4)                           | 2.3      | 3.9                       | 12.3                        | 23.5                        |
| Glu-His-Trp        | 7 (5)                           | 2.0      | 3.4                       | 8.4                         | 20.6                        |
| Glu-Phe-His        | 7 (9)                           | 2.0      | 3.4                       | 7.2                         | 11.9                        |
| Asp-His-Tyr        | 6 (7)                           | 1.7      | 4.0                       | 7.2                         | 8.5                         |
| Glu-Trp-Phe        | 6 (20) **                       | 1.7      | 2.9                       | 9.2                         | 3.2                         |
| Asp-Phe-His        | 5 (7)                           | 1.4      | 3.4                       | 5.2                         | 8.5                         |
| Asp-Phe-Tyr        | 5 (8)                           | 1.4      | 3.4                       | 5.2                         | 7.0                         |
| Glu-Tyr-Trp        | 4 (6)                           | 1.1      | 2.0                       | 3.7                         | 11.0                        |

|             |       |     |     |     |     |
|-------------|-------|-----|-----|-----|-----|
| Asp–Tyr–Trp | 3 (4) | 0.8 | 2.0 | 2.8 | 8.8 |
| Asp–Trp–Tyr | 3 (5) | 0.8 | 2.0 | 4.6 | 4.2 |
| Asp–Tyr–His | 3 (8) | 0.8 | 2.0 | 2.8 | 5.1 |
| Asp–Trp–Trp | 2 (3) | 0.6 | 1.3 | 3.1 | 5.9 |
| Asp–Trp–His | 2 (5) | 0.6 | 1.3 | 3.1 | 3.4 |
| Glu–Trp–Tyr | 2 (8) | 0.6 | 1.0 | 3.1 | 2.8 |
| Glu–Trp–His | 1 (6) | 0.3 | 0.5 | 1.5 | 1.7 |

---
